# Supplementary material
Source: Springer Nature journal article supplement (https://www.springermedizin.de/resource/supplementary/12936_2014_3300_MOESM3_ESM.pdf/9545574)

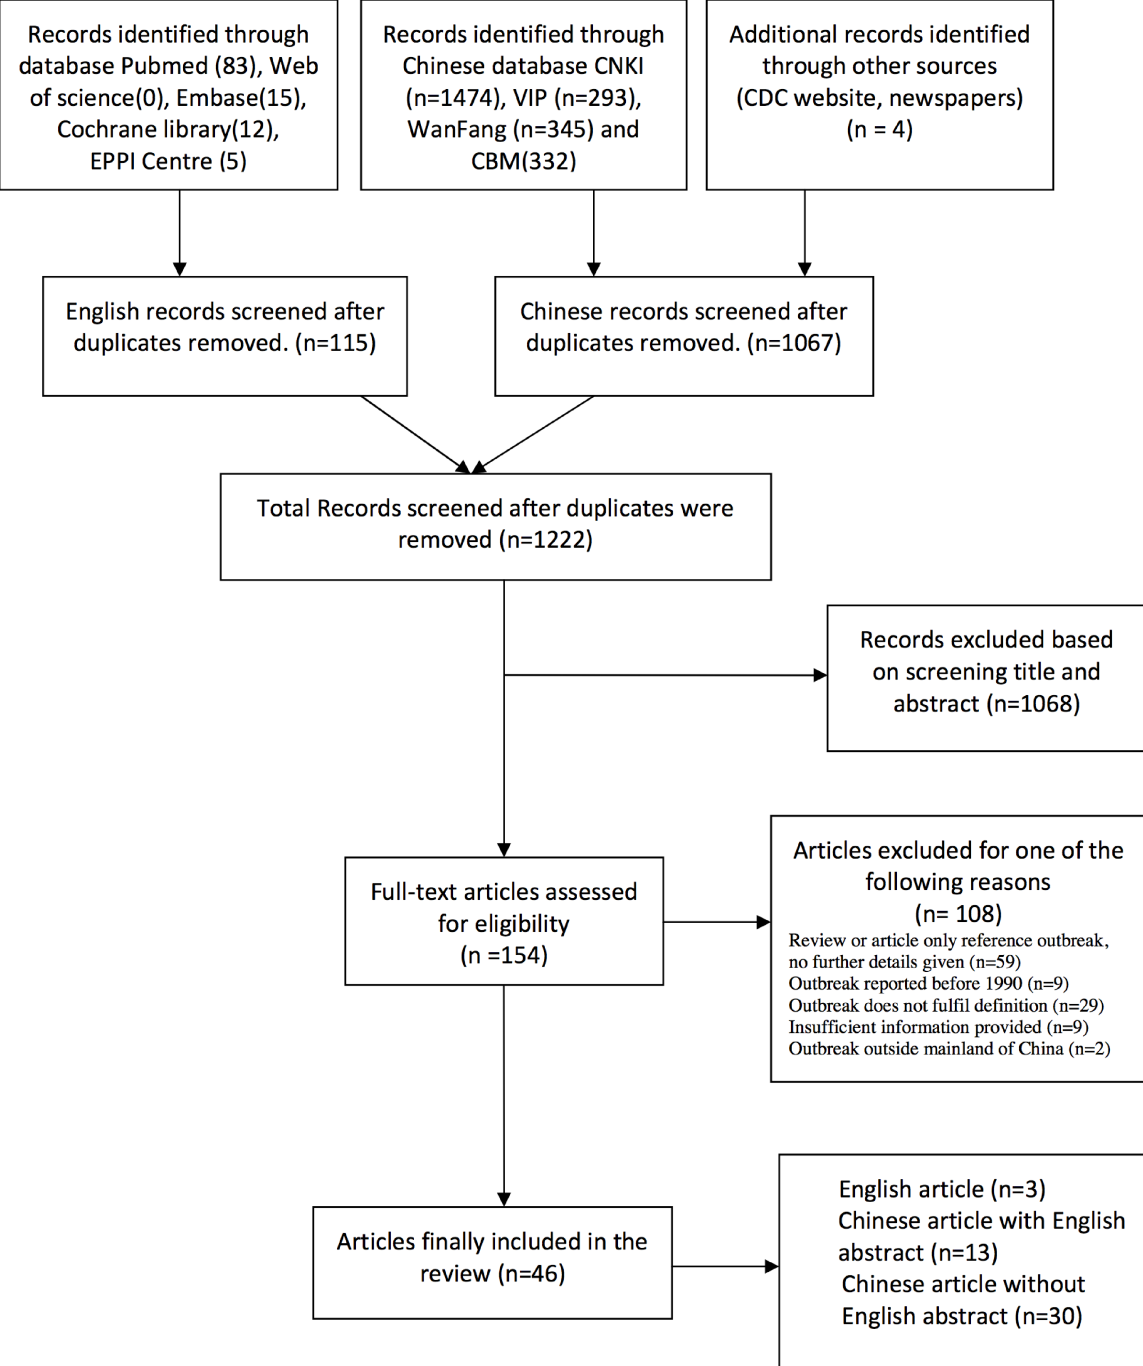

Supplement: MOESM3 [file 9545574]
